# Supplementary material for: Injectable and biodegradable supramolecular hydrogels formed by nucleobase-terminated poly(ethylene oxide)s and α-cyclodextrin
Source: Royal Society of Chemistry journal article supplement (doi:10.1039/c3tb21475c), 2013-11-11
Supplement: c3tb21475c.pdf [file c3tb21475c.pdf]

## Supporting Information

# **Injectable and Biodegradable Supramolecular Hydrogels formed by Nucleobases-terminated Poly(ethylene oxide)s and $\alpha$ -Cyclodextrin**

*Huihui Kuang<sup>a,b</sup>, Hongyan He<sup>a,b</sup>, Zhiyun Zhang<sup>a,b</sup>, Yanxin Qi<sup>a</sup>, Zhigang Xie<sup>a</sup>, Xiabin  
Jing<sup>a</sup>, Yubin Huang<sup>a,\*</sup>*

<sup>a</sup> State Key Laboratory of Polymer Physics and Chemistry, Changchun Institute of Applied Chemistry, Chinese Academy of Sciences, Changchun 130022, P. R. China

<sup>b</sup> University of Chinese Academy of Sciences, Beijing 100039, P. R. China

\* Correspondence to: Yubin Huang, State Key Laboratory of Polymer Physics and Chemistry, Changchun Institute of Applied Chemistry, Chinese Academy of Sciences, Changchun 130022, People's Republic of China. Tel & Fax: +86-431-85262769;  
E-mail: [ybhuang@ciac.ac.cn](mailto:ybhuang@ciac.ac.cn)

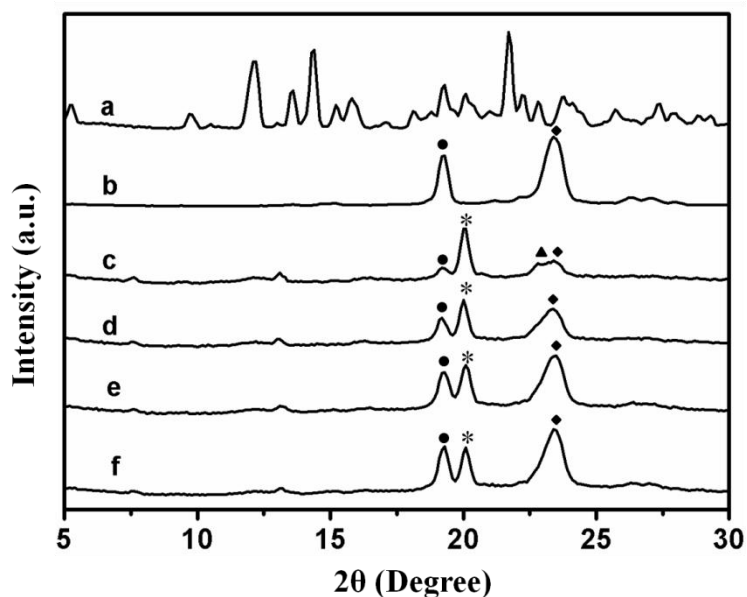

**Figure S1.** Powder X-ray diffraction of (a)  $\alpha$ -CD, (b) PEG20k, (c) G5, (d) G6, (e) G7 and (f) G8. The characteristic X-ray diffraction peaks of crystalline columnar  $\alpha$ -CD at around  $2\theta = 19.9$  and  $22.6^\circ$  as well as PEG at around  $2\theta = 19.3$  and  $23.5^\circ$  are labeled with \*, ▲, ● and ◆, respectively.

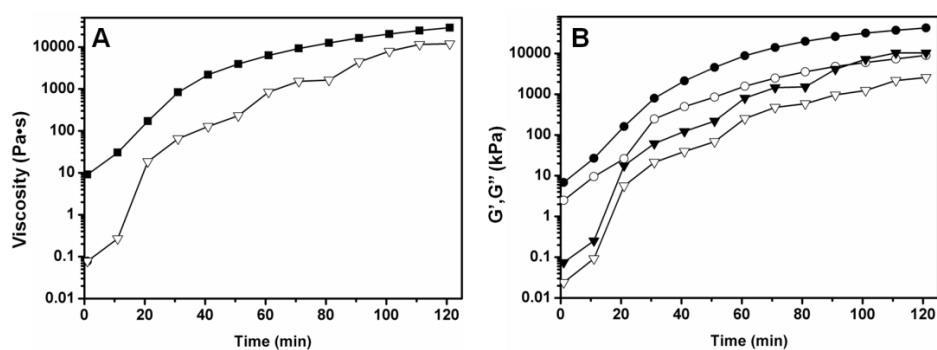

**Figure S2.** (A) Changes of viscosities of hydrogels as a function of time. (■, viscosity of G4 hydrogel; □, viscosity of PEG10k/ $\alpha$ -CD (20 wt %/10 wt %) hydrogel); (B) Time sweep measurements for the viscoelastic properties of hydrogels as a function of time. (●,  $G'$  and ○,  $G''$  of G4 hydrogel; ▼,  $G'$  and ▽,  $G''$  of PEG10k/ $\alpha$ -CD (20 wt %/10 wt %) hydrogel).

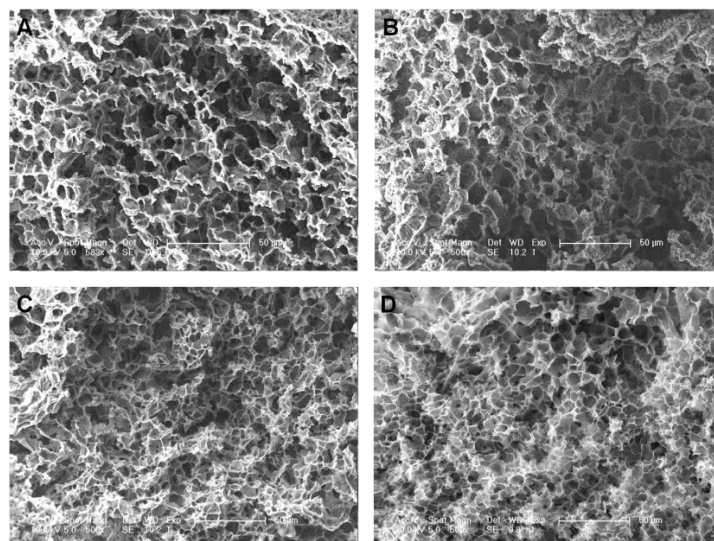

**Figure S3.** The SEMs of the lyophilized hydrogels. (A) G2, (B) G4, (C) G6, (D) G8. Scale bar = 50  $\mu\text{m}$ .

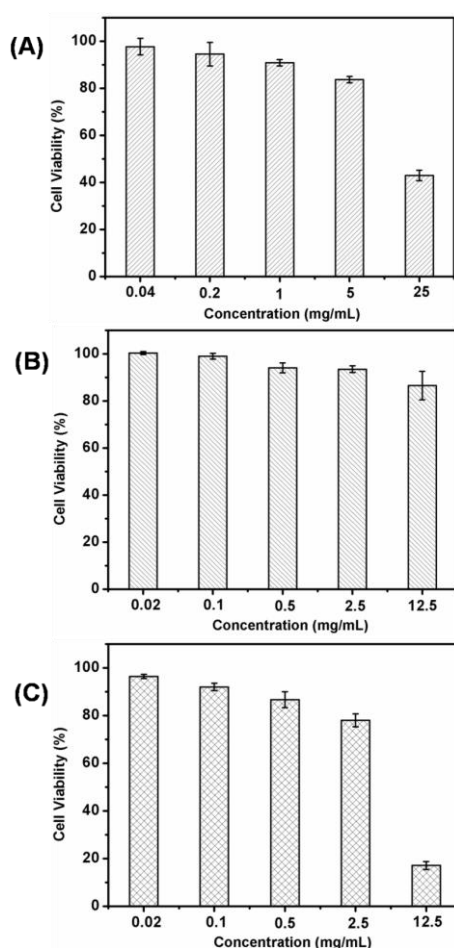

**Figure S4.** Cell viability of the freeze-dried powder of G2 hydrogel (A) at various concentrations as well as B-PEG10k-B (B) and  $\alpha$ -CD (C) at equivalent concentrations against L929 cell line for 48 h.

**Table S1.** Preparation of PEG/ $\alpha$ -CD Hydrogels

| gel precursor <sup>a</sup> | gel composition <sup>b</sup> | results |                                  |                                  |
|----------------------------|------------------------------|---------|----------------------------------|----------------------------------|
|                            | polymer (wt %)               | gels    | gelation time <sup>c</sup> (min) | gelation time <sup>d</sup> (min) |
| PEG10k                     | 5                            | G1'     | 24                               | 33                               |
|                            | 10                           | G2'     | 7                                | 20                               |
|                            | 15                           | G3'     | 5                                | 16                               |
|                            | 20                           | G4'     | 4                                | 12                               |
| PEG20k                     | 5                            | G5'     | 10                               | 15                               |
|                            | 10                           | G6'     | 5                                | 11                               |
|                            | 15                           | G7'     | 2                                | 9                                |
|                            | 20                           | G8'     | 1                                | 6                                |

<sup>a</sup> The gel precursor was composed of PEG.

<sup>b</sup> The concentration of  $\alpha$ -CD solution was kept at 10 wt % for all the studies.

<sup>c</sup> The gelation time was measured at room temperature.

<sup>d</sup> The gelation time was measured at 37 °C.
